# Supplementary material for: Hydrogen bonding sewing interface
Source: Royal Society of Chemistry journal article supplement (doi:10.1039/d0ra00366b), 2020-01-01
Supplement: d0ra00366b1.pdf [file d0ra00366b1.pdf]

## Supporting Information

### Hydrogen Bonding Sewing Interface

Zhenxing Cao<sup>1,2,†</sup>, Zhigong Song<sup>3,†</sup>, Fengzhi Liang<sup>2,†</sup>, Xiaoguang An<sup>4</sup>, Karrar K. Al-Quraishi<sup>2</sup>, Min Wang<sup>2</sup>, Jianchao Chen<sup>4</sup>, Dong Ding<sup>5,\*</sup>, and Yingchao Yang<sup>2,\*</sup>

<sup>1</sup> Department of Materials Engineering, Changshu Institute of Technology, 99 Nansanhuan Rd., Changshu, Jiangsu 215500 P. R. China

<sup>2</sup> Department of Mechanical Engineering, University of Maine, 5711 Boardman Hall, Orono, ME 04469 USA

<sup>3</sup> School of Engineering, Brown University, 184 Hope Street, Providence, RI 02912 USA

<sup>4</sup> School of Mechanical Engineering, Yanshan University, 438 W. Hebei Street, Qinhuangdao, Hebei 066004 P. R. China

<sup>5</sup> Energy & Environmental Science and Technology, Idaho National Laboratory, Idaho Falls, ID, 83401, USA

† These authors contribute equally.

\* Corresponding author: D. Ding, email: dong.ding@inl.gov; Y. Yang, email: yingchao.yang@maine.edu

## Section I. Mechanical Properties of Aramid Sensing Fibers

**Table S1.** Mechanical properties of aramid sensing fibers.

| Test #                       | Fiber Diameter<br>μm | Tensile Strength<br>GPa | Elastic Modulus<br>GPa |
|------------------------------|----------------------|-------------------------|------------------------|
| Test 1                       | 17.4                 | 2.08                    | 50.76                  |
| Test 2                       | 17.4                 | 3.94                    | 93.18                  |
| Test 3                       | 17.4                 | 2.71                    | 81.04                  |
| Test 4                       | 17.4                 | 2.85                    | 93.41                  |
| Test 5                       | 17.4                 | 3.64                    | 70.14                  |
| Test 6                       | 17.4                 | 3.60                    | 82.46                  |
| Test 7                       | 17.4                 | 2.63                    | 80.14                  |
| Average ± standard deviation |                      | 3.06 ± 0.67             | 78.73 ± 14.73          |

## Section II. Spring Constant Measurement of Aramid Sensing Cantilevers

**Table S2.** Spring constant measurement of individual aramid sensing cantilevers.

| Sensor # | Fiber Diameter $\mu\text{m}$ | Elastic Modulus GPa | Length mm | Spring constant N/m |
|----------|------------------------------|---------------------|-----------|---------------------|
| Sensor 1 | 17.4                         | 78.73               | 5.60      | 0.0043              |
| Sensor 2 | 17.4                         | 78.73               | 2.55      | 0.046               |
| Sensor 3 | 17.4                         | 78.73               | 1.69      | 0.157               |
| Sensor 4 | 17.4                         | 78.73               | 3.56      | 0.017               |
| Sensor 5 | 17.4                         | 78.73               | 2.67      | 0.040               |
| Sensor 6 | 17.4                         | 78.73               | 2.56      | 0.045               |
| Sensor 7 | 17.4                         | 78.73               | 2.97      | 0.029               |
| Sensor 8 | 17.4                         | 78.73               | 2.56      | 0.045               |

## Section III. Debonding of Individual Carbon Fiber out of FTO Glass without Water Pretreatment

**Table S3.** Specific ISR between individual carbon fiber and FTO glass without water pretreatment.

| Test #                           | Sensor # | Spring constant (N/m) | Contact length (mm) | Deflection ( $\mu\text{m}$ ) | Debonding force ( $\mu\text{N}$ ) | Specific ISR ( $\mu\text{N/mm}$ ) |
|----------------------------------|----------|-----------------------|---------------------|------------------------------|-----------------------------------|-----------------------------------|
| 1                                | 1        | 0.0043                | 0.29                | 220                          | 0.95                              | 3.27                              |
| 2                                | 1        | 0.0043                | 0.29                | 143                          | 0.62                              | 2.14                              |
| 3                                | 1        | 0.0043                | 0.29                | 190                          | 0.83                              | 2.86                              |
| 4                                | 1        | 0.0043                | 0.29                | 154                          | 0.68                              | 2.34                              |
| Average $\pm$ standard deviation |          |                       |                     |                              |                                   | 2.65 $\pm$ 0.51                   |

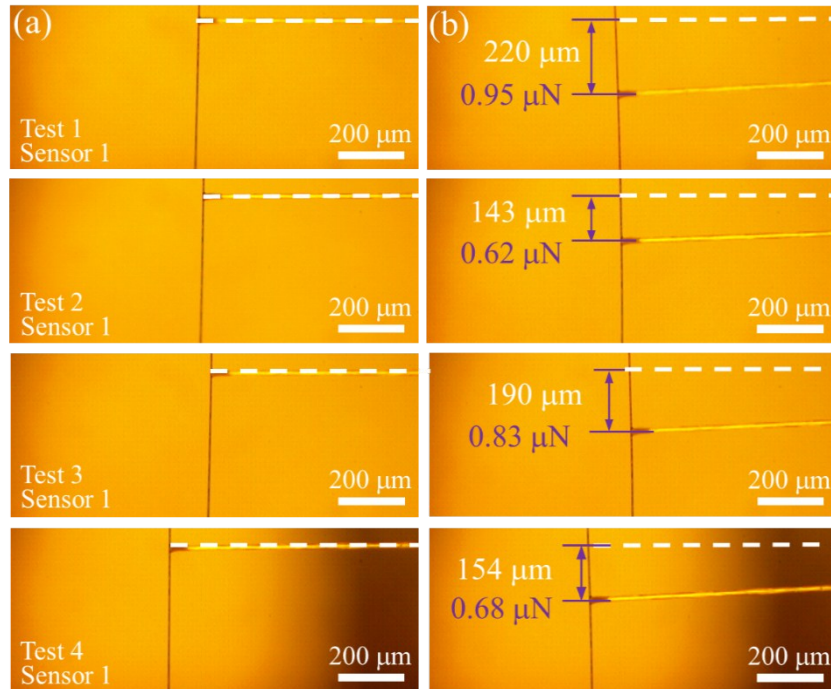

**Figure S1. Debonding of individual carbon fiber out of FTO glass without water pretreatment.** Column (a) Optical image of bridged carbon fiber and aramid sensing fiber before test. Column (b) Last moment before debonding the carbon fiber out of the FTO glass.

**Section IV. Debonding of Individual Water-treated Carbon Fiber out of FTO Glass after Water Evaporation**

**Table S4.** Specific ISR between individual water-treated carbon fiber and FTO glass after water evaporation.

| Test #                           | Sensor # | Spring constant (N/m) | Contact length (mm) | Deflection ( $\mu\text{m}$ ) | Debonding force ( $\mu\text{N}$ ) | Specific ISR ( $\mu\text{N/mm}$ ) |
|----------------------------------|----------|-----------------------|---------------------|------------------------------|-----------------------------------|-----------------------------------|
| 1                                | 2        | 0.046                 | 0.28                | 899                          | 41.35                             | 147.14                            |
| 2                                | 2        | 0.046                 | 0.28                | 869                          | 39.97                             | 142.14                            |
| 3                                | 2        | 0.046                 | 0.28                | 736                          | 33.86                             | 120.36                            |
| 4                                | 3        | 0.157                 | 0.28                | 395                          | 62.02                             | 221.79                            |
| Average $\pm$ standard deviation |          |                       |                     |                              |                                   | 157.86 $\pm$ 44.18                |

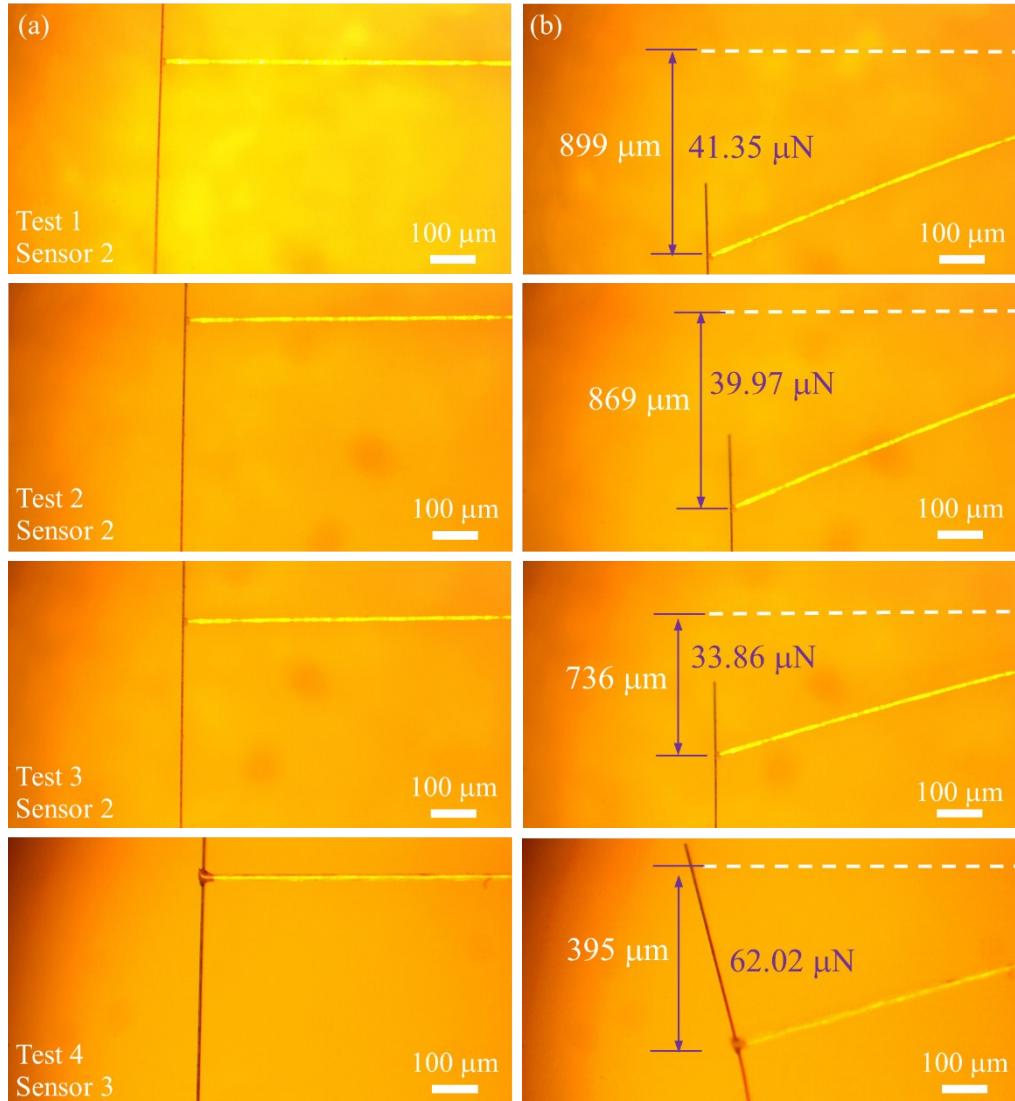

**Figure S2. Debonding of individual water-treated carbon fiber out of FTO glass after water evaporation.** Column (a) Optical image of bridged **water-treated** carbon fiber and aramid sensing fiber before test. Column (b) Last moment before debonding the carbon fiber out of the FTO glass after water treatment.

**Section V. Debonding of Individual Hexane-treated Carbon Fiber out of FTO after Hexane Evaporation**

**Table S5.** Specific ISR between individual hexane-treated carbon fiber and FTO glass after hexane evaporation.

| Test #                           | Sensor # | Spring constant (N/m) | Contact length (mm) | Deflection ( $\mu\text{m}$ ) | Debonding force ( $\mu\text{N}$ ) | Specific ISR ( $\mu\text{N}/\text{mm}$ ) |
|----------------------------------|----------|-----------------------|---------------------|------------------------------|-----------------------------------|------------------------------------------|
| 1                                | 4        | 0.017                 | 0.28                | 66                           | 1.12                              | 4.00                                     |
| 2                                | 4        | 0.017                 | 0.28                | 65                           | 1.10                              | 3.93                                     |
| 3                                | 5        | 0.040                 | 0.28                | 21                           | 0.83                              | 2.96                                     |
| 4                                | 5        | 0.040                 | 0.28                | 23                           | 0.93                              | 3.32                                     |
| Average $\pm$ standard deviation |          |                       |                     |                              |                                   | 3.55 $\pm$ 0.50                          |

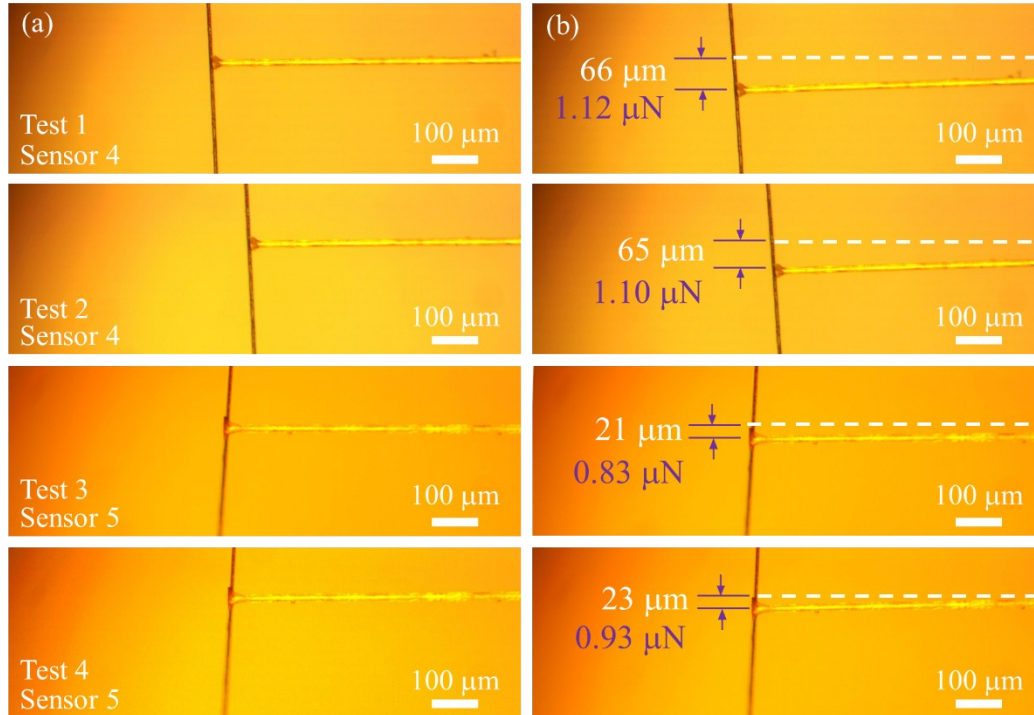

**Figure S3. Debonding of an individual hexane-treated carbon fiber out of FTO glass after hexane evaporation.** Column (a) Optical image of bridged hexane-treated carbon fiber and aramid sensing fiber before test. Column (b) Last moment before debonding the carbon fiber out of the FTO glass after hexane evaporation.

## Section VI. Debonding of Individual Carbon Fiber out of Au Coated Glass without Pretreatment

**Table S6.** Specific ISR between individual carbon fiber and Au coated glass without pretreatment.

| Test #                           | Sensor # | Spring constant (N/m) | Contact length (mm) | Deflection ( $\mu\text{m}$ ) | Debonding force ( $\mu\text{N}$ ) | Specific ISR ( $\mu\text{N}/\text{mm}$ ) |
|----------------------------------|----------|-----------------------|---------------------|------------------------------|-----------------------------------|------------------------------------------|
| 1                                | 1        | 0.0043                | 0.29                | 62                           | 0.27                              | 0.93                                     |
| 2                                | 1        | 0.0043                | 0.29                | 132                          | 0.57                              | 1.97                                     |
| 3                                | 1        | 0.0043                | 0.29                | 113                          | 0.49                              | 1.69                                     |
| 4                                | 1        | 0.0043                | 0.29                | 73                           | 0.32                              | 1.10                                     |
| Average $\pm$ standard deviation |          |                       |                     |                              |                                   | 1.42 $\pm$ 0.49                          |

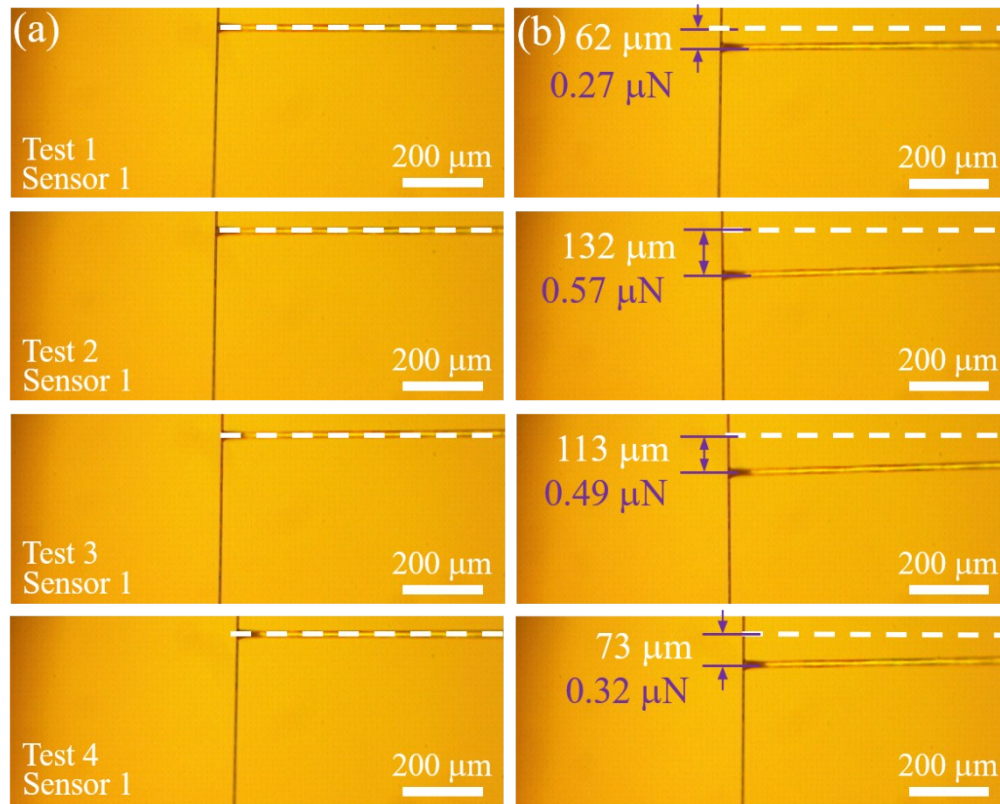

**Figure S4. Debonding of individual carbon fiber out of Au coated glass without pretreatment.** Column (a) Optical image of bridged carbon fiber and aramid sensing fiber before test. Column (b) Last moment before debonding the carbon fiber out of the Au without water pretreatment.

## Section VII. Debonding of Individual Water-treated Carbon Fiber out of Au Coated Glass after Water Evaporation

**Table S7.** Specific ISR between individual water-treated carbon fiber and Au coated glass after water evaporation.

| Test #                           | Sensor # | Spring constant (N/m) | Contact length (mm) | Deflection ( $\mu\text{m}$ ) | Debonding force ( $\mu\text{N}$ ) | Specific ISR ( $\mu\text{N}/\text{mm}$ ) |
|----------------------------------|----------|-----------------------|---------------------|------------------------------|-----------------------------------|------------------------------------------|
| 1                                | 3        | 0.157                 | 0.28                | 158                          | 24.80                             | 88.57                                    |
| 2                                | 3        | 0.157                 | 0.28                | 174                          | 27.40                             | 97.86                                    |
| 3                                | 6        | 0.045                 | 0.26                | 605                          | 27.25                             | 104.81                                   |
| 4                                | 6        | 0.045                 | 0.26                | 587                          | 26.42                             | 101.62                                   |
| Average $\pm$ standard deviation |          |                       |                     |                              |                                   | 98.21 $\pm$ 7.03                         |

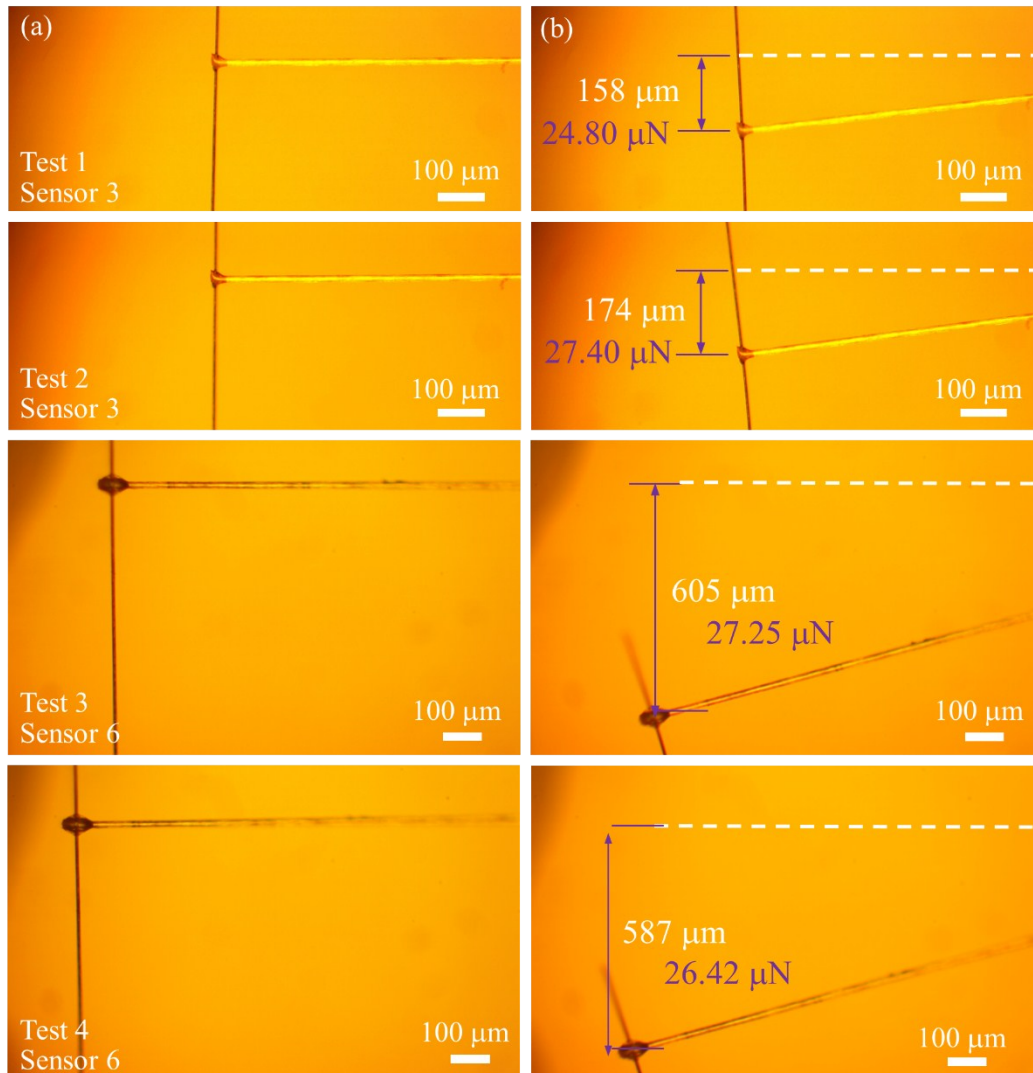

**Figure S5. Debonding of individual water-treated carbon fiber out of Au coated glass after water evaporation.** Column (a) Optical image of bridged water-treated carbon fiber and aramid sensing fiber before test. Column (b) Last moment before debonding the carbon fiber out of the Au after water treatment.

## Section VIII. Contact Angle Measurement

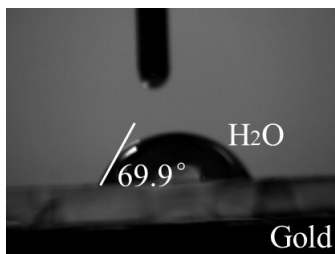

**Figure S6.** Measurement of contact angle between H<sub>2</sub>O and Au coated glass.

## Section IX. Debonding of Individual Hexane-treated Carbon Fiber out of Au Coated glass after Hexane Evaporation

**Table S8.** Specific ISR between an individual hexane-treated carbon fiber and Au coated glass after hexane evaporation.

| Test #                       | Sensor # | Spring constant (N/m) | Contact length (mm) | Deflection (μm) | Debonding force (μN) | Specific ISR (μN/mm) |
|------------------------------|----------|-----------------------|---------------------|-----------------|----------------------|----------------------|
| 1                            | 7        | 0.029                 | 0.26                | 22              | 0.64                 | 2.46                 |
| 2                            | 8        | 0.045                 | 0.26                | 27              | 1.12                 | 4.67                 |
| 3                            | 1        | 0.0043                | 0.31                | 305             | 1.45                 | 4.67                 |
| 4                            | 1        | 0.0043                | 0.33                | 231             | 0.99                 | 3.01                 |
| Average ± standard deviation |          |                       |                     |                 |                      | 3.70±1.14            |

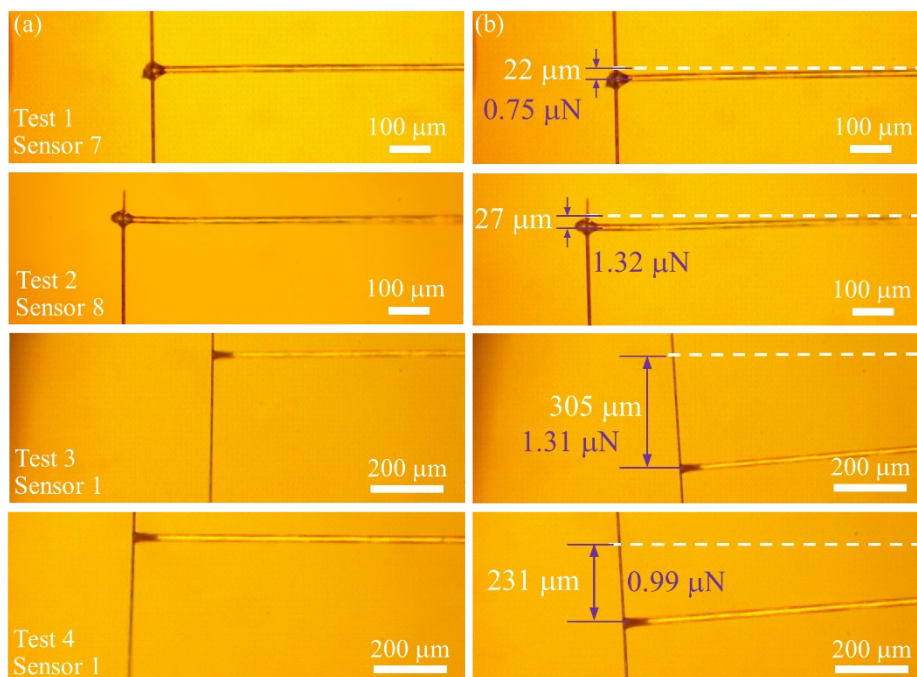

**Figure S7. Debonding of individual hexane-treated carbon fiber out of Au coated glass after hexane evaporation.** Column (a) Optical image of bridged hexane-treated carbon fiber and aramid sensing fiber before test. Column (b) Last moment before debonding the carbon fiber out of the Au after hexane evaporation.
